# Supplementary material for: Synthetic Design of Asymmetric miRNA with an Engineered 3′ Overhang to Improve Strand Selection
Source: PubMed Central journal article supplement (PMC6517641; doi:10.1016/j.omtn.2019.04.012), 2019-04-19
Supplement: mmc1.pdf [file mmc1.pdf]

**OMTN, Volume 16**

## **Supplemental Information**

### **Synthetic Design of Asymmetric miRNA**

**with an Engineered 3' Overhang**

**to Improve Strand Selection**

**Sandeep Kadekar, Ganesh N. Nawale, Kira Karlsson, Cecilia Ålander, Oommen P. Oommen, and Oommen P. Varghese**

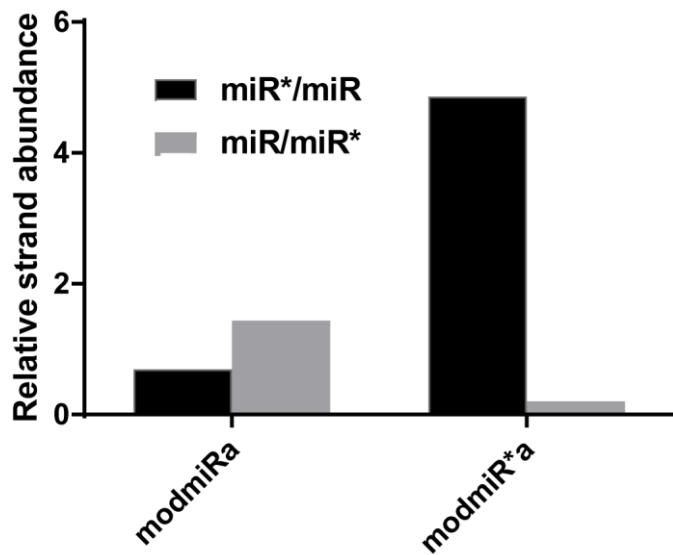

Figure S1. Stem loop qPCR analysis of strand recruitment for 5-nucleotide overhang miRNAs (modmiRa and modmiR\*).

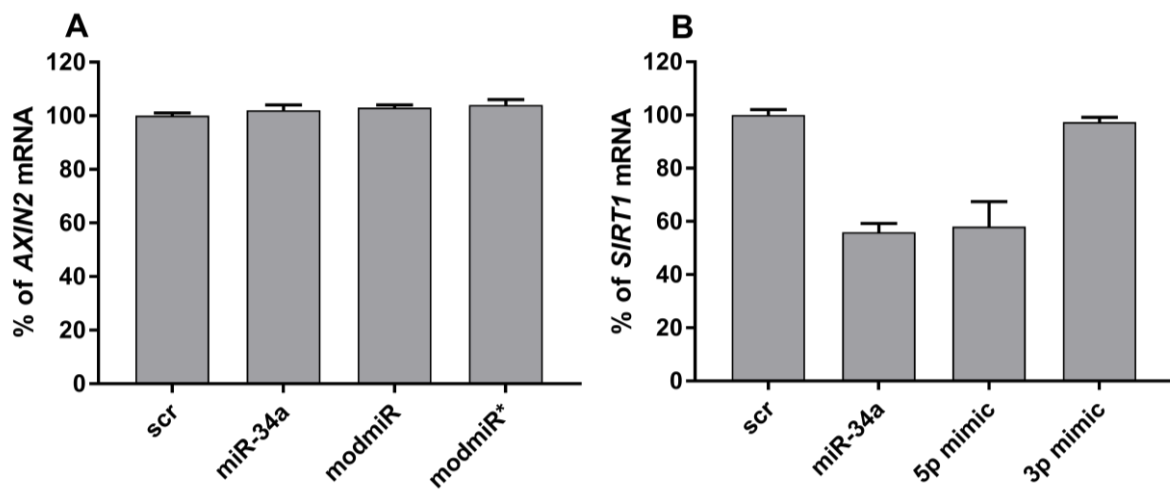

Figure S2. qPCR analysis for A) *AXIN2* and B) *SIRT1* mRNA levels. Cells were treated with different miRNAs for 48 h.

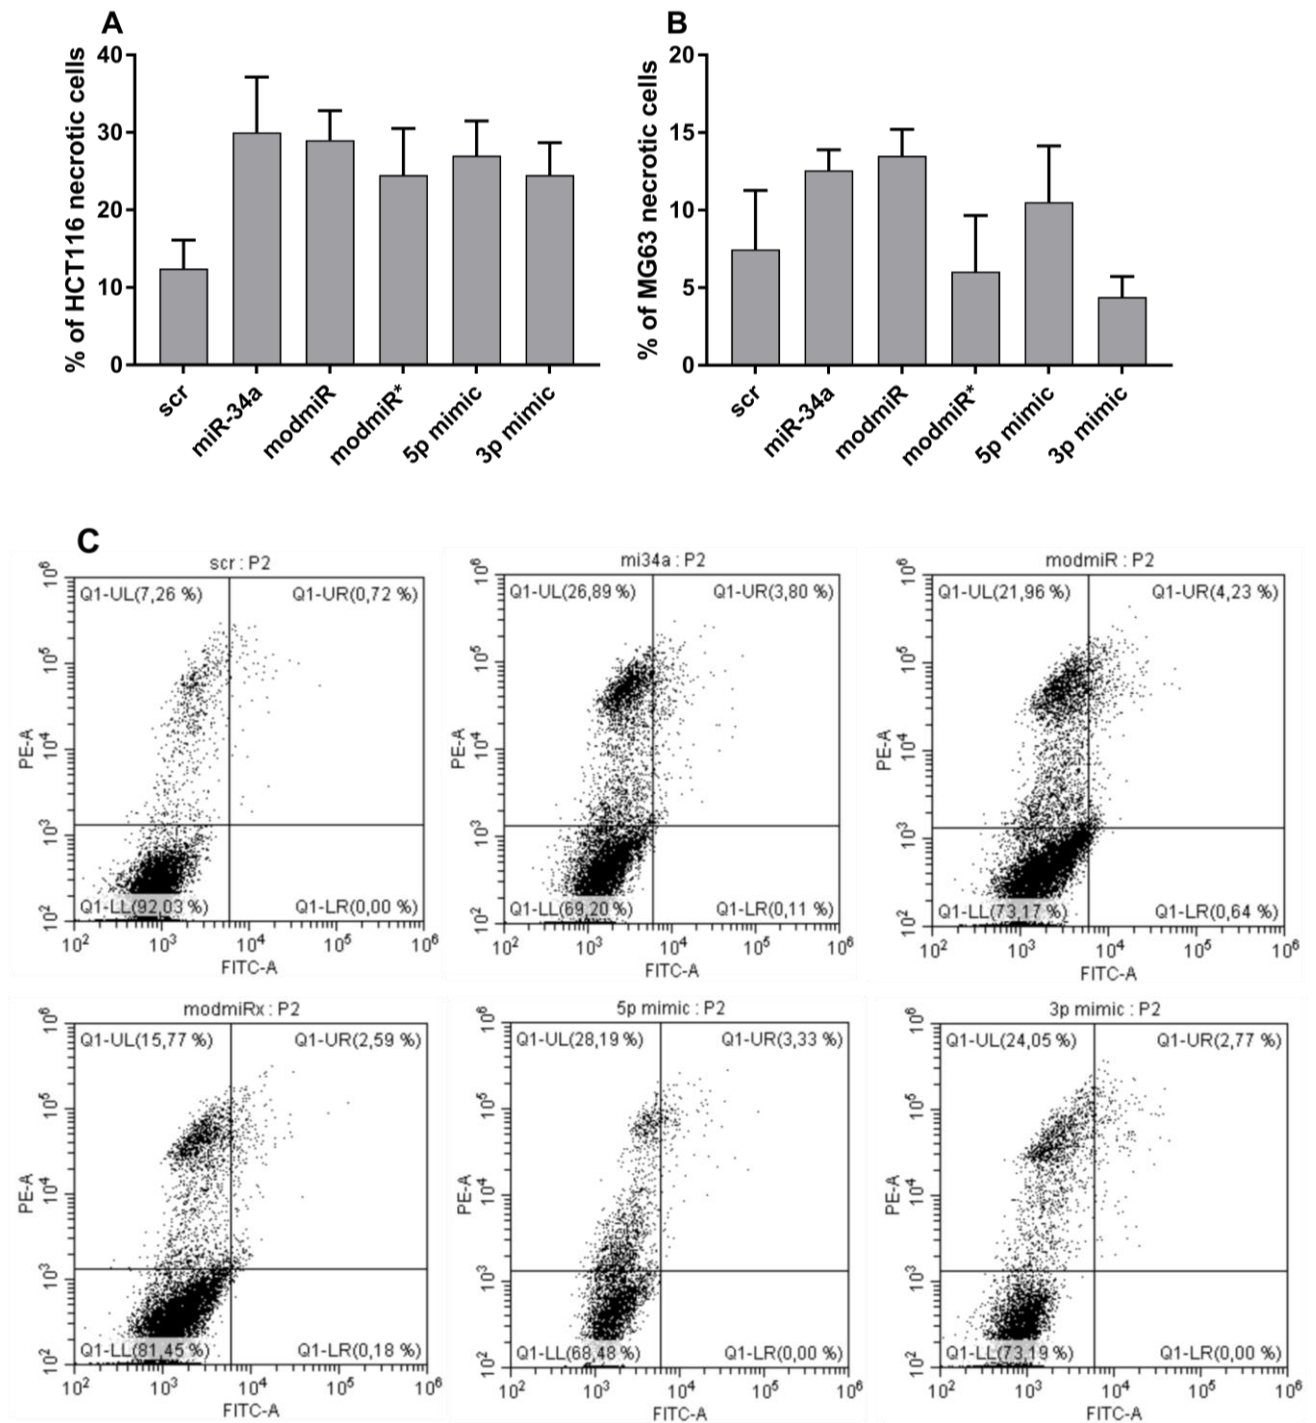

**Figure S3. FACS analysis for HCT116 and MG63 cells. Cells were treated with different miRNAs for 48 h. A) and C) HCT116 cells were analysed for apoptotic and necrotic cells. B) MG63 cells were analysed for necrotic cells.**
